# Supplementary material
Source: Springer Nature journal article supplement (https://www.springermedizin.de/resource/supplementary/12958_2007_419_MOESM5_ESM.pdf/9567838)

20

40

60

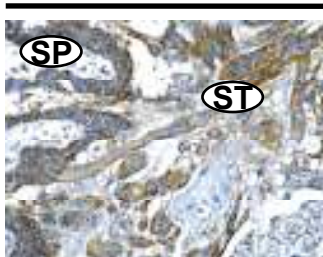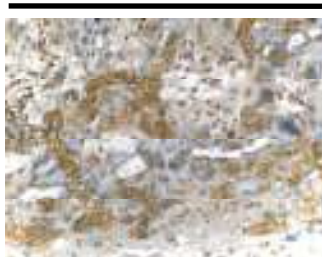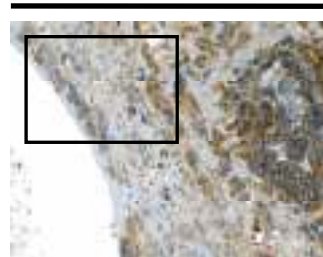

VEGF

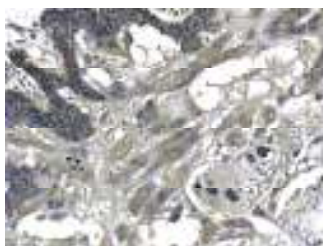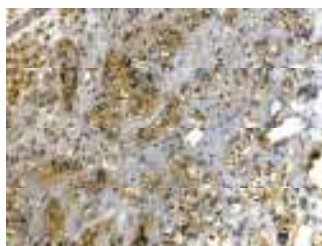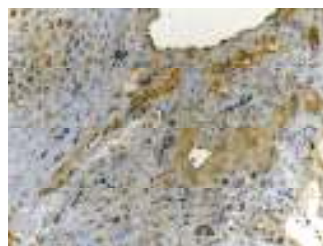

Flt-1

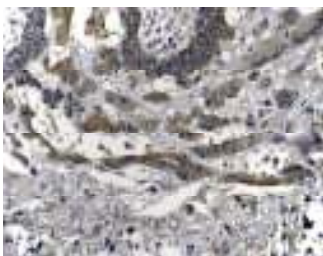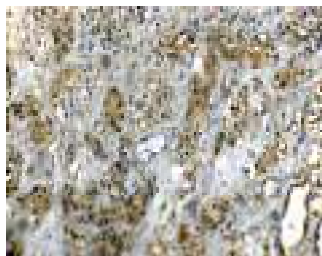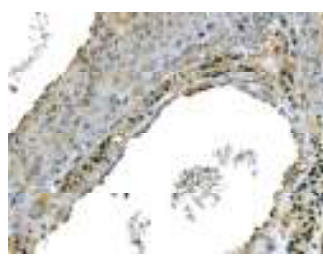

KDR

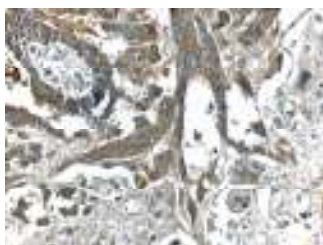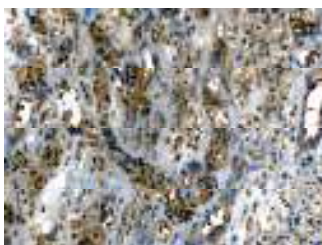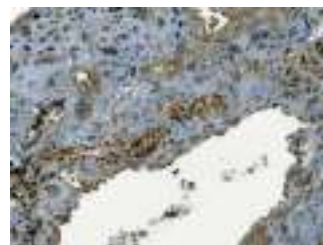

B2R

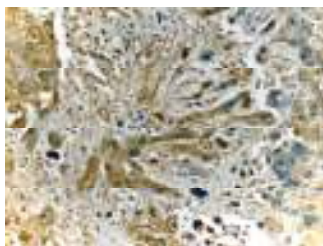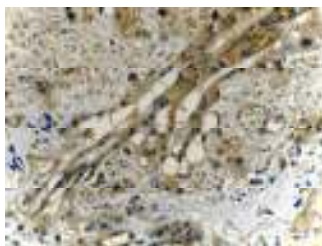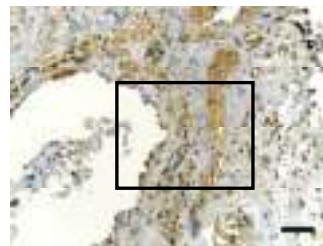

eNOS

Supplement: MOESM5 [file 9567838]
